# Supplementary material for: Association of the metabolic score for insulin resistance with cardiovascular diseases, cardiovascular and all-cause mortality in Chinese hypertensive population
Source: PubMed Central journal article supplement (PMC10957551; doi:10.3389/fendo.2023.1326436), 2024-03-08
Supplement: Table_1.pdf [file Table_1.pdf]

**Association of the metabolic score for insulin resistance (METS-IR)  
with cardiovascular diseases, cardiovascular and all-cause mortality  
in Chinese hypertensive population**

**Liting Zhang<sup>1,2,3,4</sup>, Hongdong Jiang<sup>5</sup>, Chao Yu<sup>1,2,3,4</sup>, Tao Wang<sup>1,2,3,4</sup>, Wei Zhou<sup>1,2,3,4</sup>, Linjuan Zhu<sup>1,2,3,4</sup>, Jine Liu<sup>1,2,3,4</sup>, Dan Sun<sup>1,2,3,4</sup>, Chuanli Yu<sup>1,2,3,4</sup>, Huihui Bao<sup>\*1,2,3,4</sup>, Xiaoshu Cheng<sup>1,2,3,4</sup>**

1. Department of Cardiovascular Medicine, the Second Affiliated Hospital of Nanchang University, Nanchang of Jiangxi, China.
2. Center for Prevention and Treatment of Cardiovascular Diseases, the Second Affiliated Hospital of Nanchang University, Nanchang of Jiangxi, China.
3. Jiangxi Provincial Cardiovascular Disease Clinical Medical Research Center, Nanchang of Jiangxi, China.
4. Jiangxi Sub-center of National Clinical Research Center for Cardiovascular Diseases, Nanchang of Jiangxi, China.
5. General Department of Jiangwan Town Central Health Center, Wuyuan County, Jiangxi, China.

**\*Correspondence:**

Huihui Bao  
Huihui\_bao77@126.com

**Table S1 : The relationship between METS-IR index and cardiovascular mortality in the Fine and Gray competing risk model.**

| Variables      | Model 1*        |         |
|----------------|-----------------|---------|
|                | HR/95%CI        | P value |
| METS-IR Per SD | 1.56(1.07,2.29) | 0.021   |

Model 1\* adjusted for age, sex, BMI, current smoking status, mean SBP, mean DBP, hypoglycemic drugs, lipid-lowering drugs, antihypertensive drugs, AST, ALT.

METS-IR: metabolic score for insulin resistance;  
BMI: body mass index; SBP: systolic blood pressure;  
DBP: diastolic blood pressure; AST: aspartate transaminase; ALT: alanine transaminase.

**Table S2: Baseline characteristics of the study population according to their survival status.**

| Variables                     | Total       | Survival    | Death       | <i>P</i> value |
|-------------------------------|-------------|-------------|-------------|----------------|
| <b>Sex, n (%)</b>             |             |             |             | <0.001         |
| Male                          | 6714(47.2%) | 6209(46.3%) | 505(62.7%)  |                |
| Female                        | 7506(52.8%) | 7206(53.7%) | 300(37.3%)  |                |
| Age, year                     | 63.8 ±9.4   | 63.3 ±9.2   | 72.6 ±8.4   |                |
| Height, cm                    | 156.1 ±8.2  | 156.1 ±8.2  | 155.0 ±8.4  | <0.001         |
| Weight, cm                    | 57.7 ±10.7  | 58.0 ±10.7  | 52.4 ±10.0  | <0.001         |
| BMI, kg/m <sup>2</sup>        | 23.6 ±3.7   | 23.7 ±3.7   | 21.8 ±3.5   | <0.001         |
| SBP, mmHg                     | 148.4 ±17.9 | 148.2 ±17.6 | 150.8 ±21.6 | <0.001         |
| DBP, mmHg                     | 88.9 ±10.8  | 89.1 ±10.6  | 85.2 ±12.1  | <0.001         |
| HR, bmp                       | 76.7 ±14.2  | 76.5 ±13.9  | 79.7 ±17.5  | <0.001         |
| Current smoking               | 3658(25.7%) | 3413(25.4%) | 245(30.4%)  | 0.002          |
| Current drinking              | 3062(21.5%) | 2910(21.7%) | 152(18.9%)  | 0.059          |
| Use of hypoglycemic drugs     | 754(5.3%)   | 697(5.2%)   | 57(7.1%)    | 0.394          |
| Use of lipid-lowering drugs   | 506(3.6%)   | 473(3.5%)   | 33(4.1%)    | 0.020          |
| Use of antihypertensive drugs | 9219(64.8%) | 8649(64.5%) | 570(70.8%)  | <0.001         |
| <b>Education</b>              |             |             |             | <0.001         |
| Primary and below             | 9207(79.9%) | 8585(79.4%) | 622(88.9%)  |                |
| Secondary school              | 2135(18.5%) | 2063(19.1%) | 72(10.3%)   |                |
| University and above          | 176(1.5%)   | 170(1.6%)   | 6(0.9%)     |                |
| <b>Life level</b>             |             |             |             | 0.036          |
| Rich                          | 1503(13.0%) | 1403(13.0%) | 100(14.3%)  |                |
| Ordinary                      | 7741(67.2%) | 7301(67.5%) | 440(62.9%)  |                |
| Poor                          | 2274(19.7%) | 2114(19.5%) | 160(22.9%)  |                |
| <b>Laboratory indicators</b>  |             |             |             |                |
| FBG, mmol/L                   | 6.2 ±1.6    | 6.2 ±1.6    | 6.3 ±2.1    | 0.076          |
| TG, mmol/L                    | 1.8 ±1.3    | 1.8 ±1.3    | 1.5±1.0     | <0.001         |
| HDL, mmol/L                   | 1.6 ±0.4    | 1.6 ±0.4    | 1.6 ±0.4    | 0.641          |
| LDL, mmol/L                   | 3.0 ±0.8    | 3.0 ±0.8    | 2.8±0.8     | <0.001         |
| AST, mmol/L                   | 26.8 ±15.8  | 26.8 ±15.8  | 26.8±16.3   | 0.985          |
| ALT, mmol/L                   | 20.5 ±16.6  | 20.7±16.7   | 17.0±14.0   | <0.001         |

BMI: body mass index; SBP: systolic blood pressure; DBP: diastolic blood pressure; HR: heart rate; FBG: fasting blood glucose; TG: triglyceride; HDL: high-density lipoprotein; LDL: low-density lipoprotein; METS-IR: metabolic score for insulin resistance; AST: aspartate transaminase; ALT: alanine transaminase

**Table S3: Multivariable-adjust HRs and 95%CI of the METS-IR index quartiles associated with CVD, cardiovascular Mortality, all-cause mortality.**

| Variables                   | Event, n (%) | Model 1*        |         |
|-----------------------------|--------------|-----------------|---------|
|                             |              | HR/95%CI        | P Value |
| <b>CVD</b>                  |              |                 |         |
| METS-IR Per SD              |              | 1.66(1.30,2.12) | <0.001  |
| METS-IR Quartiles           |              |                 |         |
| Q1                          | 103(3.62%)   | 1 [Reference]   |         |
| Q2                          | 81(2.85%)    | 1.34(0.96,1.89) | 0.089   |
| Q3                          | 71(2.50%)    | 1.58(1.04,2.39) | 0.031   |
| Q4                          | 59(2.07%)    | 1.90(1.15,3.13) | 0.012   |
| Q5                          | 55(1.93%)    | 2.67(1.45,4.92) | 0.002   |
| P For Trend                 |              |                 | 0.002   |
| <b>Cardiovascular Death</b> |              |                 |         |
| METS-IR Per SD              |              | 1.57(1.22,2.02) | <0.001  |
| METS-IR Quartiles           |              |                 |         |
| Q1                          | 129(4.54%)   | 1 [Reference]   |         |
| Q2                          | 107(3.76%)   | 1.66(1.22,2.26) | 0.001   |
| Q3                          | 64(2.25%)    | 1.44(0.95,2.18) | 0.085   |
| Q4                          | 60(2.11%)    | 2.03(1.25,3.32) | 0.004   |
| Q5                          | 39(1.37%)    | 2.15(1.15,4.04) | 0.017   |
| P For Trend                 |              |                 | 0.022   |
| <b>All-cause Death</b>      |              |                 |         |
| METS-IR Per SD              |              | 1.33(1.11,1.60) | 0.002   |
| METS-IR Quartiles           |              |                 |         |
| Q1                          | 298(10.48%)  | 1 [Reference]   |         |
| Q2                          | 177(6.22%)   | 1.10(0.88,1.38) | 0.390   |
| Q3                          | 139(4.89%)   | 1.22(0.92,1.61) | 0.173   |
| Q4                          | 104(3.66%)   | 1.31(0.93,1.84) | 0.129   |
| Q5                          | 87(3.06%)    | 1.70(1.11,2.16) | 0.024   |
| P For Trend                 |              |                 | 0.002   |

---

Model 1\* adjusted for age, sex, BMI, current smoking status, mean SBP, mean DBP, hypoglycemic drugs, lipid-lowering drugs, antihypertensive drugs, AST, ALT.  
METS-IR: metabolic score for insulin resistance; CVD: cardiovascular disease; BMI: body mass index; SBP: systolic blood pressure; DBP: diastolic blood pressure; AST: aspartate transaminase; ALT: alanine transaminase.

**Table S4: Multivariate adjusted HR and 95% CI of the METS-IR index quartile associated with CVD, cardiovascular death, and all-cause death in populations who were excluded taking hypoglycemic and lipid-lowering drugs at baseline.**

| Variables                   | Event, n (%) | Model 1         |                | Model2          |                |
|-----------------------------|--------------|-----------------|----------------|-----------------|----------------|
|                             |              | HR/95%CI        | <i>P</i> Value | HR/95%CI        | <i>P</i> Value |
| <b>CVD</b>                  |              |                 |                |                 |                |
| METS-IR Per SD              |              | 1.85(1.43,2.39) | <0.001         | 1.90(1.46,2.46) | <0.001         |
| METS-IR Quartiles           |              |                 |                |                 |                |
| Q1                          | 109(3.3%)    | 1 [Reference]   |                | 1 [Reference]   |                |
| Q2                          | 83(2.5%)     | 1.53(1.08,2.16) | 0.017          | 1.53(1.08,2.17) | 0.016          |
| Q3                          | 65(2.0%)     | 1.93(1.23,3.02) | 0.004          | 1.94(1.23,3.05) | 0.004          |
| Q4                          | 55(1.7%)     | 2.96(1.65,5.32) | <0.001         | 3.06(1.70,5.53) | <0.001         |
| P For Trend                 |              |                 | <0.001         |                 | <0.001         |
| <b>Cardiovascular Death</b> |              |                 |                |                 |                |
| METS-IR Per SD              |              | 1.63(1.25,2.12) | <0.001         | 1.74(1.34,2.27) | <0.001         |
| METS-IR Quartiles           |              |                 |                |                 |                |
| Q1                          | 147(4.5%)    | 1 [Reference]   |                | 1 [Reference]   |                |
| Q2                          | 94(2.9%)     | 1.30(0.94,1.79) | 0.111          | 1.37(0.99,1.88) | 0.058          |
| Q3                          | 72(2.2%)     | 1.57(1.03,2.40) | 0.038          | 1.68(1.09,2.57) | 0.018          |
| Q4                          | 41(1.3%)     | 1.60(0.89,2.88) | 0.115          | 1.79(0.99,3.23) | 0.053          |
| P For Trend                 |              |                 | 0.063          |                 | 0.027          |
| <b>All-cause Death</b>      |              |                 |                |                 |                |
| METS-IR Per SD              |              | 1.37(1.13,1.65) | 0.001          | 1.45(1.20,1.75) | <0.001         |

METS-IR Quartiles

|             |           |                 |       |                 |       |
|-------------|-----------|-----------------|-------|-----------------|-------|
| Q1          | 322(9.9%) | 1 [Reference]   |       | 1 [Reference]   |       |
| Q2          | 180(5.5%) | 1.12(0.89,1.40) | 0.336 | 1.15(0.92,1.44) | 0.222 |
| Q3          | 135(4.1%) | 1.31(0.97,1.76) | 0.078 | 1.37(1.01,1.84) | 0.041 |
| Q4          | 84(2.6%)  | 1.44(0.96,2.16) | 0.081 | 1.56(1.03,2.34) | 0.034 |
| P For Trend |           |                 | 0.055 |                 | 0.022 |

Model 1 adjusted for age, sex, BMI

Model 2 adjusted for age, sex, BMI, current smoking status, mean SBP, mean DBP, AST, ALT

METS-IR: metabolic score for insulin resistance; CVD: cardiovascular disease; BMI: body mass index; SBP: systolic blood pressure; DBP: diastolic blood pressure; AST: aspartate transaminase; ALT: alanine transaminase.

**Table S5: Incremental predictive value of METS- IR index.**

|                                 | C-Statistic(95% CI) | Continuous NRI | P-value      | IDI           | P-value      |
|---------------------------------|---------------------|----------------|--------------|---------------|--------------|
| <b>CVD</b>                      |                     |                |              |               |              |
| Basic model                     | 0,754(0.729,0.779)  | 1 [Reference]  |              | 1 [Reference] |              |
| Basic model +METS-IR            | 0.762(0.737,0.787)  | 0.128          | <b>0.027</b> | 0.002         | 0.093        |
| <b>Cardiovascular Mortality</b> |                     |                |              |               |              |
| Basic model                     | 0.805(0.785,0.826)  | 1 [Reference]  |              | 1 [Reference] |              |
| Basic model +METS-IR            | 0.808(0.787,0.828)  | 0.091          | <b>0.047</b> | 0.002         | <b>0.027</b> |
| <b>All-cause Mortality</b>      |                     |                |              |               |              |
| Basic model                     | 0.784(0.769,0.799)  | 1 [Reference]  |              | 1 [Reference] |              |
| Basic model +METS-IR            | 0.786(0.711,0.801)  | 0.041          | 0.113        | 0.001         | <b>0.040</b> |

Basic model included age, sex, BMI, SBP, DBP, smoking, drinking.

METS- IR: Metabolic score for insulin resistance; CVD: Cardiovascular disease; NRI: Net Reclassification Improvement; IDI: Integrated Discrimination Improvement; BMI: body mass index.
